# Supplementary material
Source: PubMed Central journal article supplement (PMC7806276)
Supplement: NIHMS1015923-supplement-1.pdf [file NIHMS1015923-supplement-1.pdf]

In the format provided by the authors and unedited.

# A unique supramolecular organization of photosystem I in the moss *Physcomitrella patens*

Masakazu Iwai <sup>1,2,6\*</sup>, Patricia Grob<sup>2,3,6</sup>, Anthony T. Iavarone<sup>4</sup>, Eva Nogales<sup>2,3,5</sup> and Krishna K. Niyogi <sup>1,2,3\*</sup>

---

<sup>1</sup>Department of Plant and Microbial Biology, University of California, Berkeley, CA, USA. <sup>2</sup>Molecular Biophysics and Integrated Bioimaging Division, Lawrence Berkeley National Laboratory, Berkeley, CA, USA. <sup>3</sup>Howard Hughes Medical Institute, University of California, Berkeley, CA, USA.

<sup>4</sup>QB3/Chemistry Mass Spectrometry Facility, University of California, Berkeley, CA, USA. <sup>5</sup>Department of Molecular and Cell Biology, University of California, Berkeley, CA, USA. <sup>6</sup>These authors contributed equally: M. Iwai, P. Grob. \*e-mail: [miwai@berkeley.edu](mailto:miwai@berkeley.edu); [niyogi@berkeley.edu](mailto:niyogi@berkeley.edu)

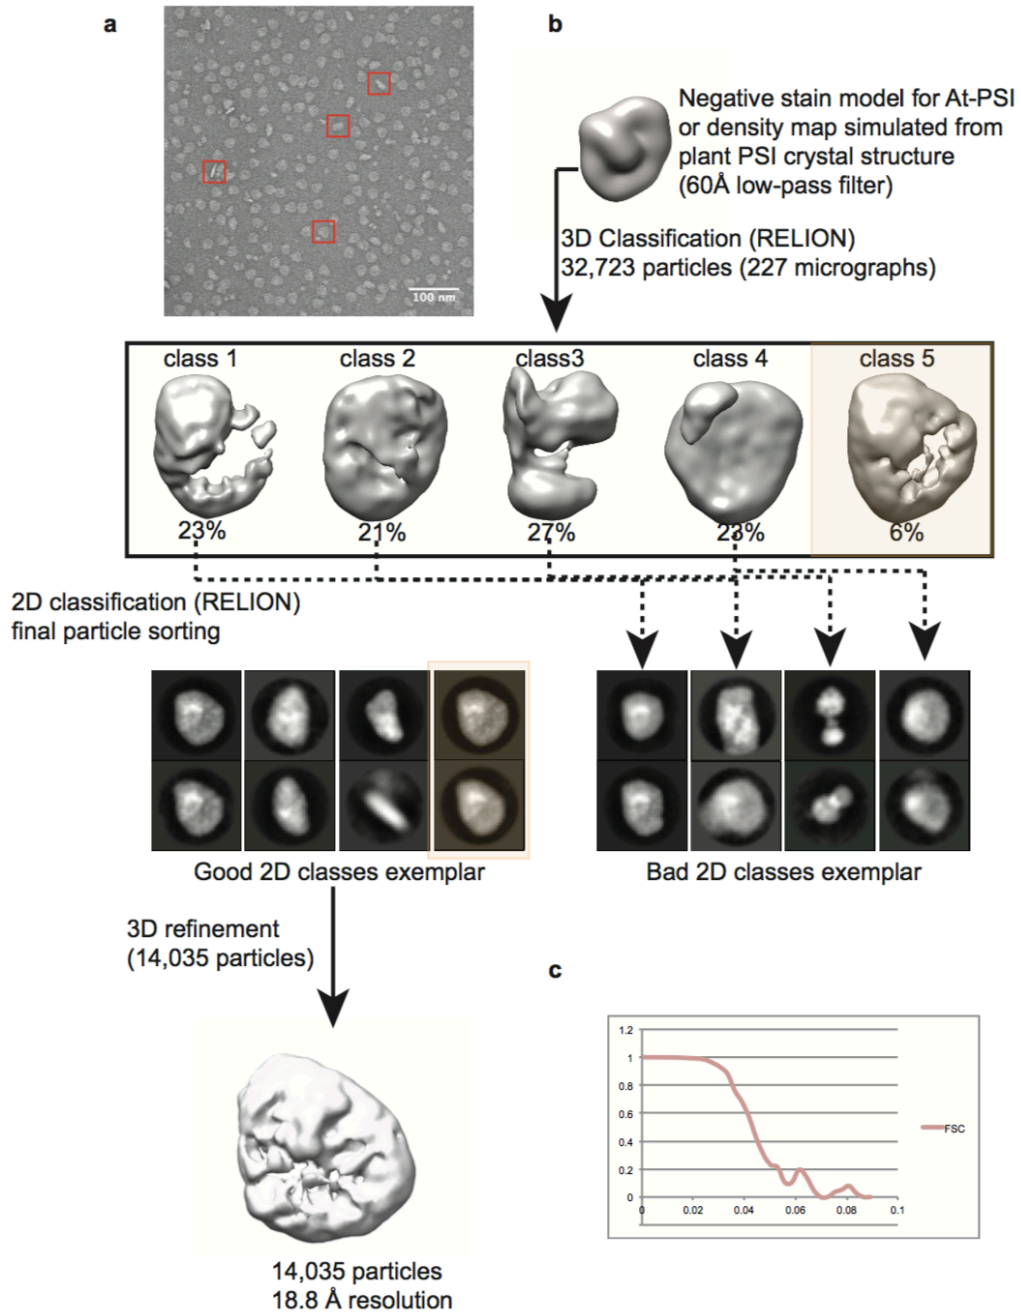

**Supplementary Figure 1 | Image processing scheme in RELION for the negative stain EM data.** Cr-PSI was used as example. **a**, A representative negative stain micrograph (from 227 micrographs) with a few particles boxed out. The data set size is summarized in Supplementary Table 2. **b**, Data was sorted in 3D, starting with the low-pass filtered (60 Å) plant PSI model as initial reference (At-PSI or *P. sativum* PDB 5L8R). Each 3D class was further analyzed by 2D classification and visual inspection. Classes corresponding to other complexes (ATP-synthase and PSII super-complexes in this example), aggregates, low quality and partial complexes were rejected while “good” classes were selected for 3D refinement. **c**, Final resolution was determined using a Fourier shell correlation (FSC) cutoff of 0.143.

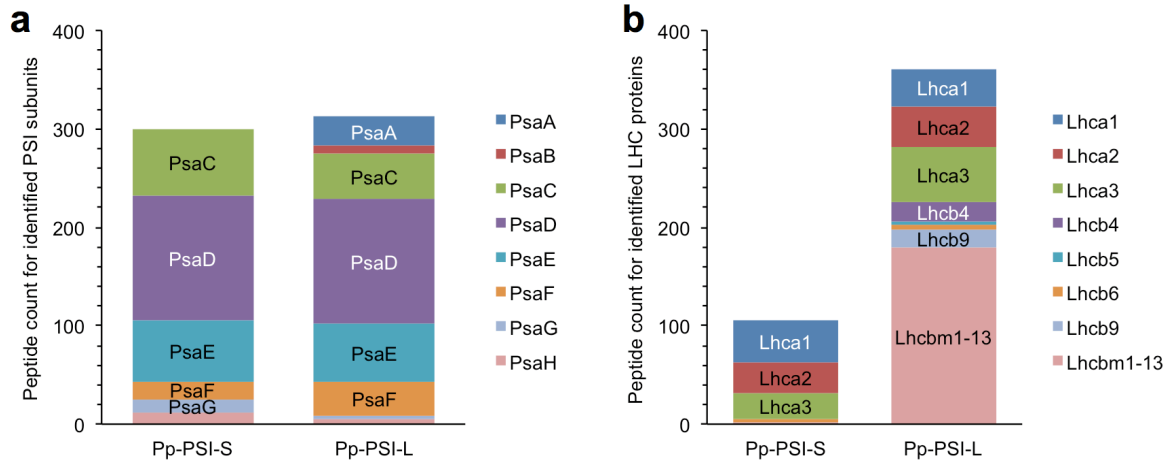

**Supplementary Figure 2 | Protein compositions in Pp-PSI-S and Pp-PSI-L identified by MS.**

The Pp-PSI-S and Pp-PSI-L were collected separately, and in-solution digestion was done for MS analysis. **a**, Peptide count identified as the PSI subunits. **b**, Peptide count identified as LHC proteins. Note that it is possible that all digested peptides were not detected due to unknown factors involving efficiency of trypsin digestion of proteins and some limitations for mass spectrometry measurements such as different levels of ionization. See Supplementary Table 3 for details.

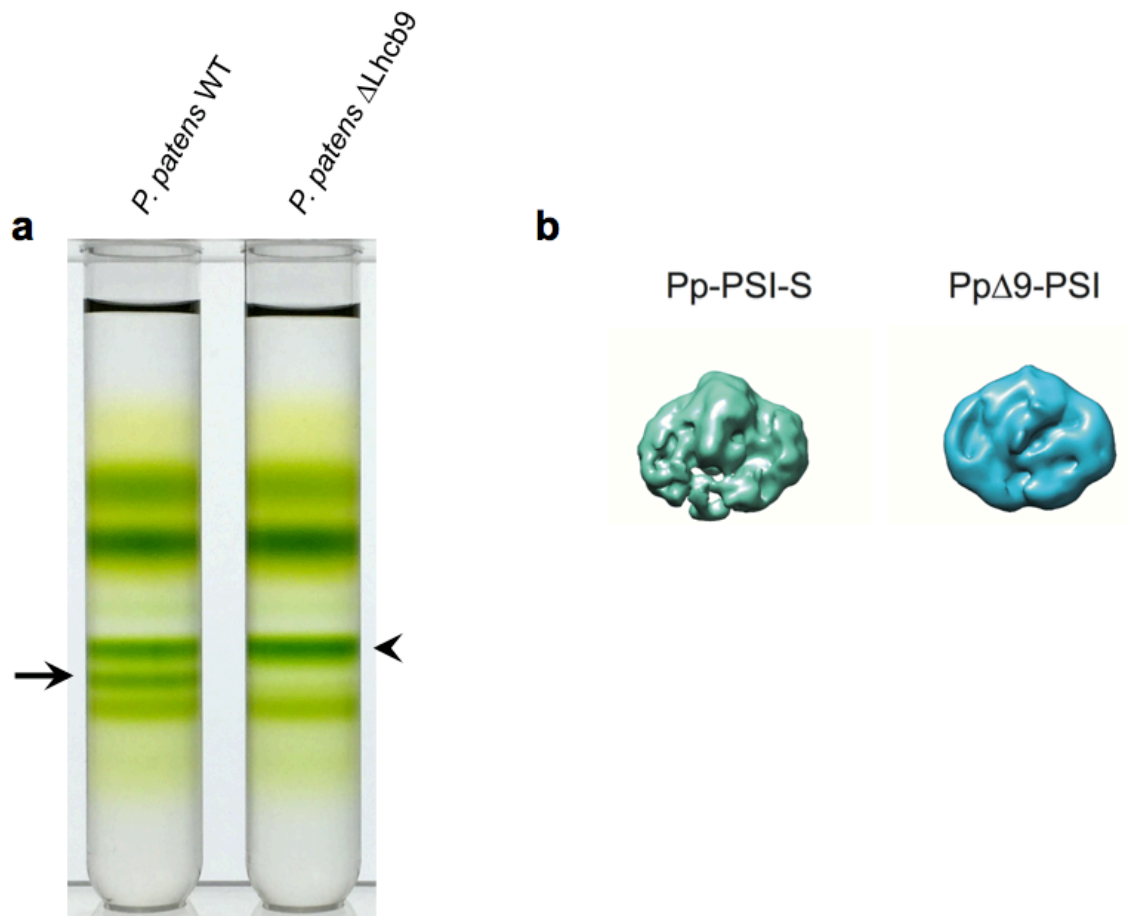

**Supplementary Figure 3 | Lack of Pp-PSI-L in *P. patens*  $\Delta$ Lhcb9 line.** **a**, Maltose density gradient ultracentrifugation to isolate photosystem supercomplexes. The arrow indicates the position of Pp-PSI-L in WT. A representative result was shown from three technical replicates. **b**, The 3D reconstruction of the fraction containing PSI-LHCI supercomplex in  $\Delta$ Lhcb9 (Pp $\Delta$ 9-PSI), which is indicated by the arrowhead in **a**. As a comparison, Pp-PSI-S from WT is also shown.

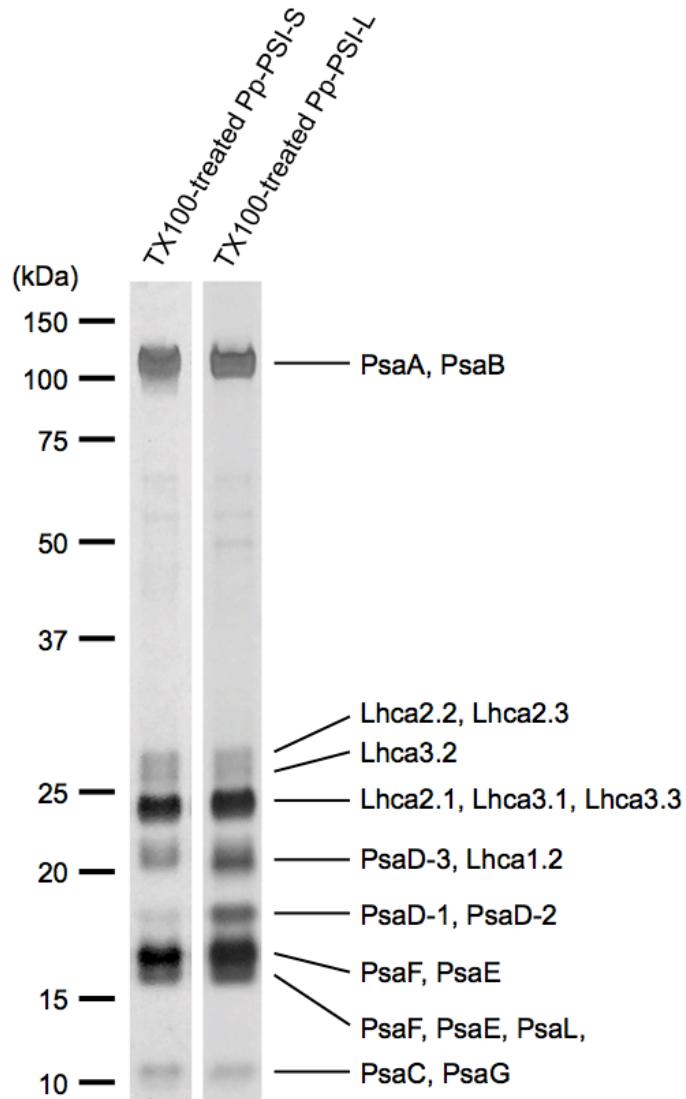

**Supplementary Figure 4 | Protein composition of the distinct green bands from Pp-PSI-S and Pp-PSI-L after TX100 treatment.** The distinct green bands as in Fig. 2a were separated by SDS-PAGE and stained by silver. The indicated bands were excised and digested by trypsin. The indicated proteins were identified by MS analysis. Representative results were shown from two technical replicates. See also Supplementary Table 4 for details.

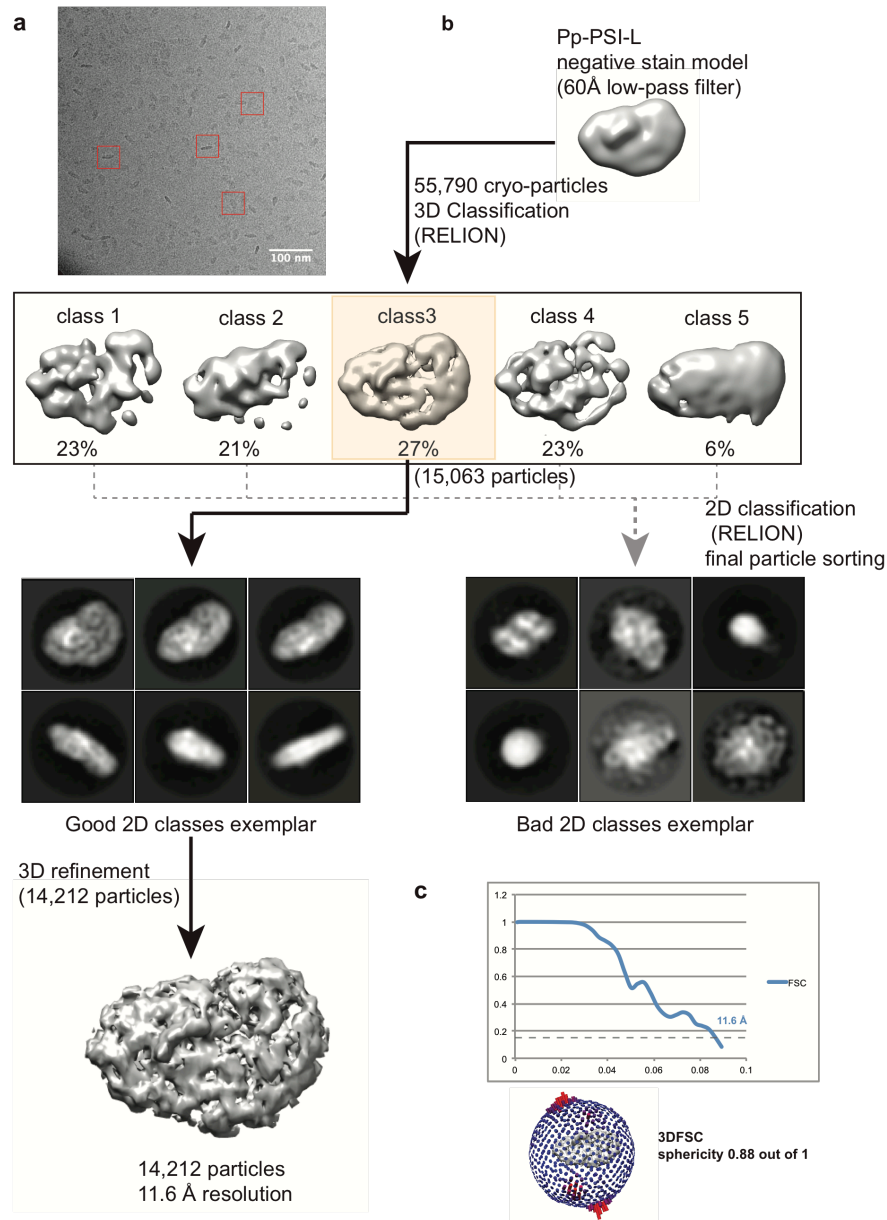

**Supplementary Figure 5 | Classification and refinement scheme for the Pp-PSI-L cryo-EM structure.** **a**, A representative cryo-EM image of the Pp-PSI-L complex (from 361 micrographs) with a few representative particles boxed out. The data set size is summarized in Supplementary Table 2. **b**, The processing scheme was similar to the one used for the negative stain data, with the exception of the initial model, which in this case comes from the negative stain Pp-PSI-L structure. Five 3D classes were used to sort out the data and a final 25% of the initial 55,790 particle data set contributed to the 11.6-Å resolution 3D reconstruction obtained after refinement. **c**, Final FSC plot and angular distribution.

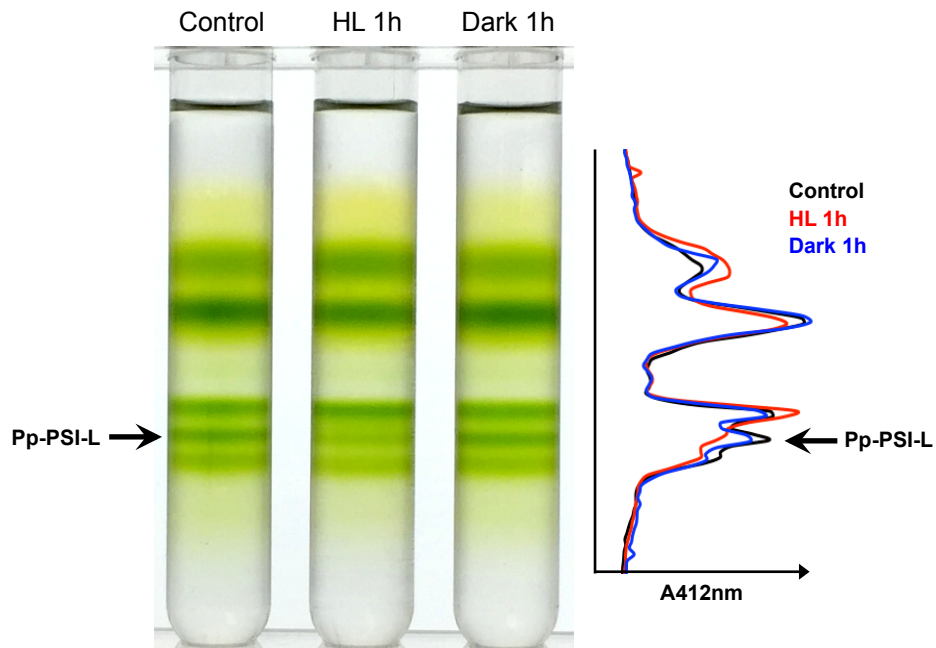

**Supplementary Figure 6 | Reduced presence of Pp-PSI-L following high-light treatment.**

The thylakoid membranes were isolated after either high light (HL;  $1000 \mu\text{mol photons m}^{-2} \text{s}^{-1}$  for 1 h) or dark treatment for 1 h, and samples were analyzed by maltose density gradient ultracentrifugation as described in the main text. The intensity of the band corresponding to Pp-PSI-L (indicated by an arrow) became lower after HL treatment. The absorbance (A) at 412 nm of each fraction is also indicated. A representative result was shown from two technical replicates.

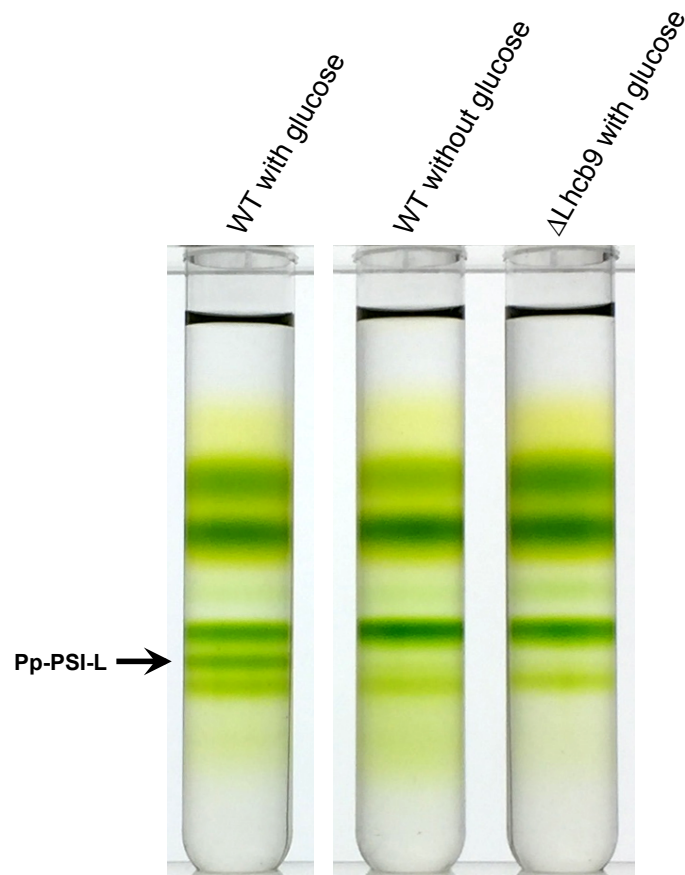

**Supplementary Figure 7 | Lack of Pp-PSI-L under growth conditions lacking an external carbon source.** *P. patens* WT protonema cells were grown on BCDAT agarose media with or without glucose (5 g/L), under continuous light for 3 days. The thylakoid membranes were isolated and analyzed by maltose density gradient ultracentrifugation as described in the main text. The band corresponding to Pp-PSI-L (indicated by an arrow) was completely missing in the WT grown without glucose. The result of  $\Delta$ Lhcb9 line grown with glucose is also shown for comparison. Representative results were shown from three technical replicates.



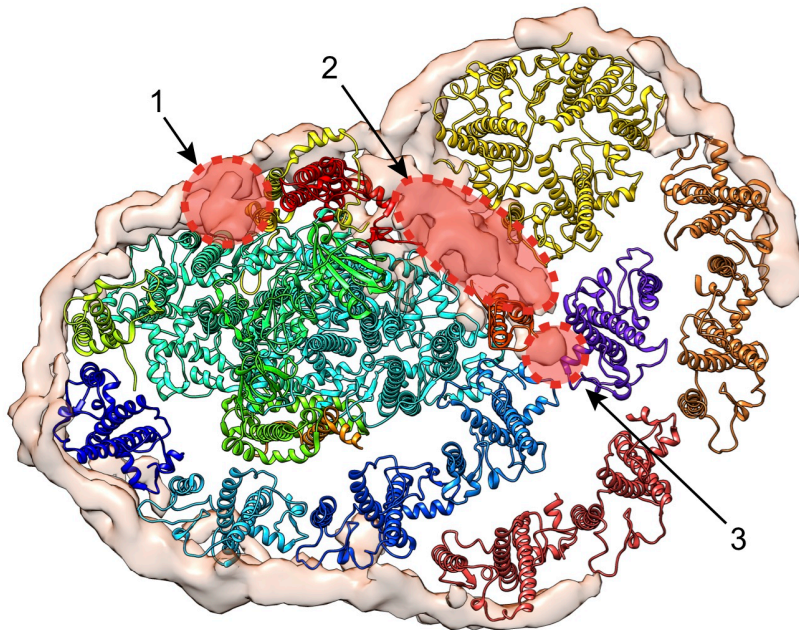

**Supplementary Figure 8 | The difference map showing the unassigned density in**

**Pp-PSI-L.** We used Chimera molmap to measure the size of unassigned density and compare it to putative components of the Pp-PSI-L. After excluding densities at the periphery, which are likely to be detergent or remaining lipids bound to the complex, we were left with mainly 3 small densities (dotted red circles). Since some of the unassigned density is probably due to lipids, detergents, and bound pigments, which are not discernable at this resolution, we did not quantify them as percentage of the mass. Instead, we compared their size to known proteins modeled with Chimera molmap. The circle 1 indicates a possible transmembrane density near PsaI that is large enough for a single helix and could correspond to one of the smallest PSI subunits, such as PsaM, but this has yet to be corroborated. The circle 2 indicates the largest density between PsaL, PsaA, and LHCII trimer that is large enough to have two trans-membrane helices and can tentatively be assigned to a small PSI subunit such as PsaO, as was determined for the recently published red alga PSI-LHCI and maize PSI-LHCI-LHCII complex structures (Pi X. et al., PNAS, 2018; PMID: 29632169; Pan et al., Science, 2018; PMID: 29880686). The circle 3 indicates a small nearby density that is only large enough for the PsaK N-terminus. Confirming this putative assignment for these extra densities and any further modeling will require a higher resolution map.

**Supplementary Table 1 | Peptide counts identified in the lighter fraction produced from the TRX-treated Pp-PSI-L in the second run of maltose density gradient ultracentrifugation.** MS analysis revealed the protein compositions in the lighter fraction produced from the TRX-treated Pp-PSI-L, which was originated from the additional LHC complex as shown in Figure 2a.

| <b>LHC proteins</b> | <b>Accession</b> | <b>Peptide counts</b> |
|---------------------|------------------|-----------------------|
| Lhca1.1             | A9T399           | 7                     |
| Lhca1.2             | A9T3X6           | 6                     |
| Lhca1.3             | A9TJX6           | 6                     |
| Lhca2.1             | A9RW10           | 9                     |
| Lhca2.2             | A9TV00           | 17                    |
| Lhca3.1             | A9TEM8           | 14                    |
| Lhca3.3             | A9TB65           | 10                    |
| Lhcb3               | A9TKU6           | 14                    |
| Lhcb4.1             | A9U3M1           | 32                    |
| Lhcb4.2             | A9T2F8           | 43                    |
| Lhcb5               | A9U5B1           | 6                     |
| Lhcb6               | A9RU32           | 3                     |
| Lhcb9.1             | A9RR33           | 18                    |
| Lhcbm1              | A9RNP2           | 24                    |
| Lhcbm2              | A9RT62           | 35                    |
| Lhcbm4              | Q765P5           | 22                    |
| Lhcbm7              | A9T914           | 38                    |
| Lhcbm9              | A9SGM1           | 13                    |
| Lhcbm10             | Q765P6           | 15                    |
| Lhcbm13             | A9RJS3           | 23                    |

**Supplementary Table 2 | Summary of all EM data.** Total data collected, data selected through classification in RELION and the final 3D reconstruction resolution after refinement determined by Fourier shell correlation at the 0.143 cutoff after refinement when applicable.

| <b>PSI-LHCI supercomplexes</b> | <b>Number of micrographs</b> | <b>Total number of particles in dataset</b> | <b>Final number of particles after sorting</b> | <b>% of population</b> | <b>Number of 3D classes</b> | <b>Final resolution (Å)</b> |
|--------------------------------|------------------------------|---------------------------------------------|------------------------------------------------|------------------------|-----------------------------|-----------------------------|
| <b>At-PSI</b>                  | 213                          | 27900                                       | 18499                                          | 66                     | 5                           | 16.8                        |
| <b>Cr-PSI</b>                  | 227                          | 32800                                       | 14035                                          | 43                     | 5→4→3                       | 18.9                        |
| <b>Pp-PSI-S</b>                | 392                          | 40861                                       | 9266                                           | 23                     | 5                           | 16.7                        |
| <b>Pp-PSI-L</b>                | 619                          | 56635                                       | 12700                                          | 22                     | 3→2                         | 21.1                        |
| <b>PpΔb9-PSI</b>               | 316                          | 18873                                       | 8225                                           | 43                     | 3                           | 19.9                        |
| <b>Pp-PSI-S-TX100</b>          | 90                           | 14480                                       |                                                |                        |                             |                             |
| <b>Pp-PSI-L-TX100</b>          | 180                          | 30846                                       |                                                |                        |                             |                             |
| <b>Pp-PSI-L cryo-EM</b>        | 361                          | 55780                                       | 14412                                          | 26                     | 5                           | 11.6                        |

**Supplementary Table 3 | Peptide counts identified in Pp-PSI-S and Pp-PSI-L by MS.** The Pp-PSI-S and Pp-PSI-L were collected separately, and in-solution digestion was done for MS analysis. See also Supplementary Figure 2.

| <b>PSI subunits</b> | <b>Accession</b> | <b>Pp-PSI-S</b> | <b>Pp-PSI-L</b> |
|---------------------|------------------|-----------------|-----------------|
| PsaA                | Q8MFA3           | 0               | 29              |
| PsaB                | Q8MFA2           | 0               | 8               |
| PsaC                | Q6YXQ2           | 68              | 46              |
|                     | A9REG3           | 72              | 60              |
| PsaD                | A9SGR0           | 54              | 44              |
|                     | A9RBZ9           | 0               | 23              |
|                     | A9SPD7           | 31              | 22              |
| PsaE                | A9TU20           | 17              | 25              |
|                     | A9TVA9           | 15              | 12              |
|                     | A9SHP6           | 11              | 13              |
| PsaF                | A9TWD4           | 7               | 8               |
|                     | A9SUQ3           | 0               | 8               |
|                     | A9RNK7           | 0               | 5               |
| PsaG                | A9SJ10           | 9               | 4               |
|                     | A9SH79           | 4               | 0               |
| PsaH                | A9SL09           | 12              | 5               |
| <b>LHC proteins</b> | <b>Accession</b> | <b>Pp-PSI-S</b> | <b>Pp-PSI-L</b> |
| Lhca1.1             | A9T399           | 15              | 11              |
| Lhca1.2             | A9T3X6           | 14              | 11              |
| Lhca1.3             | A9TJX6           | 14              | 16              |
| Lhca2.1             | A9RW10           | 14              | 19              |
| Lhca2.2             | A9TV00           | 8               | 11              |
| Lhca2.3             | A9TJ06           | 4               | 12              |
| Lhca2.4             | A9U5E4           | 5               | 0               |
| Lhca3.1             | A9TEM7           | 22              | 35              |
| Lhca3.3             | A9TB65           | 4               | 20              |
| Lhcb4.1             | A9U3M1           | 0               | 11              |
| Lhcb4.2             | A9T2F8           | 0               | 9               |
| Lhcb5               | A9U5B1           | 0               | 4               |
| Lhcb6               | A9RU32           | 4               | 4               |
| Lhcb9.1             | A9RR33           | 0               | 19              |
| Lhcbm1              | A9RNP2           | 0               | 13              |
| Lhcbm2              | A9RT62           | 0               | 23              |
| Lhcbm4              | Q765P5           | 0               | 18              |
| Lhcbm5              | A9S6S7           | 0               | 22              |
| Lhcbm6              | A9TL35           | 0               | 21              |
| Lhcbm7              | A9T914           | 0               | 28              |
| Lhcbm8              | A9RBQ3           | 2               | 0               |
| Lhcbm10             | Q765P6           | 0               | 32              |
| Lhcbm13             | A9RJS3           | 0               | 22              |

| <b>Other proteins</b>           | <b>Accession</b> | <b>Pp-PSI-S</b> | <b>Pp-PSI-L</b> |
|---------------------------------|------------------|-----------------|-----------------|
| ATP synthase $\alpha$ subunit   | Q6YXK3           | 62              | 25              |
|                                 | Q1XGA4           | 0               | 12              |
|                                 | P80658           | 78              | 44              |
| ATP synthase $\beta$ subunit    | A9RKV9           | 23              | 5               |
|                                 | A9T949           | 17              | 4               |
|                                 | A9T278           | 11              | 8               |
| ATP synthase $\gamma$ subunit   | A9TQE5           | 3               | 0               |
| ATP synthase $\delta$ subunit   | A9SYE0           | 5               | 0               |
| ATP synthase $\epsilon$ subunit | Q6YXR2           | 15              | 4               |
| D1 (PsbA)                       | Q6YXN7           | 0               | 5               |
| D2 (PsbD)                       | Q6YXN8           | 0               | 8               |
| CP43 (PsbC)                     | Q6YXN9           | 6               | 28              |
| CP47 (PsbB)                     | Q6YXM8           | 10              | 23              |
|                                 | A9U1K9           | 25              | 24              |
| PsbO                            | A9TSK0           | 19              | 19              |
|                                 | A9SA96           | 13              | 15              |
|                                 | A9RS28           | 12              | 0               |
| PsbP                            | A9SG93           | 6               | 0               |
|                                 | A9SY12           | 5               | 0               |
| PsbE (Cyt b559)                 | Q6YXL9           | 3               | 6               |
| PsbR                            | A9S7M9           | 2               | 2               |
|                                 | A9RLG5           | 0               | 4               |
| Psb32                           | A9SV74           | 0               | 2               |

**Supplementary Table 4 | Protein composition of the distinct green bands from Pp-PSI-L after TX100 treatment.** The distinct green bands as in Figure 2a were separated by SDS-PAGE and stained by silver (Supplementary Figure 4). The indicated bands were excised and digested by trypsin. The digested peptides were analyzed by MS.

| <b>PSI subunits</b> | <b>Accession</b> | <b>Peptide counts</b> |
|---------------------|------------------|-----------------------|
| PsaA                | Q8MFA3           | 15                    |
| PsaB                | Q8MFA2           | 11                    |
| PsaC                | Q6YXQ2           | 9                     |
|                     | A9REG3           | 22                    |
| PsaD                | A9SGR0           | 27                    |
|                     | A9RBZ9           | 6                     |
|                     | A9SPD7           | 16                    |
| PsaE                | A9TVA9           | 4                     |
|                     | A9SHP6           | 13                    |
| PsaF                | A9TWD4           | 27                    |
|                     | A9RNK7           | 11                    |
|                     | A9SJ10           | 3                     |
| PsaG                | A9SH79           | 1                     |
|                     | A9RLG4           | 6                     |
| PsaL                | A9S7M7           | 7                     |
| <b>LHC proteins</b> | <b>Accession</b> | <b>Peptide counts</b> |
| Lhca1.2             | A9T3X6           | 9                     |
| Lhca2.1             | A9RW10           | 9                     |
| Lhca2.2             | A9TV00           | 8                     |
| Lhca2.3             | A9TJ06           | 4                     |
| Lhca3.1             | A9TEM7           | 23                    |
| Lhca3.2             | A9U226           | 6                     |
| Lhca3.3             | A9TB65           | 8                     |
